# Supplementary material for: Examining publication bias—a simulation-based evaluation of statistical tests on publication bias
Source: PeerJ journal article supplement (doi:10.7717/peerj.4115), 2017-11-30
Supplement: analysis_files.zip [file analysis_files.zip]

# Examining publication bias – A simulation-based evaluation of statistical tests on publication bias

Andreas Schneck

## Codebook of simulation dataset

| group               | variable name | description                                                  |
|---------------------|---------------|--------------------------------------------------------------|
| process             | reg_count     | regressions executed per MA                                  |
|                     | r_time        | run-time MA in seconds                                       |
|                     | run           | run of simulation (1-4)                                      |
| parameter           | k             | number of trials in MA                                       |
|                     | pb            | intent to commit PB                                          |
|                     | trim          | intend to commit trimming (p-hacking) instead of file-drawer |
|                     | het           | degree of effect heterogeneity                               |
|                     | mu_n          | sim. number of observation in trials                         |
|                     | es            | effect size of trials                                        |
|                     |               |                                                              |
| descriptive results | mean_N        | actual number of observation in trials                       |
|                     | I_sq          | degree of effect heterogeneity in $I^2$                      |
|                     | pb_int        | actual share of intended PB                                  |
|                     | pb_com        | actual share of committed PB                                 |
|                     | pb_suc        | auctual share of successful PB                               |
| Test results        | pu_p          | p-uniform: p-value                                           |
|                     | pu_N          | p-uniform: number of included trials                         |
|                     | pet_t         | FAT/PET: t-value of PET                                      |
|                     | fat_t         | FAT/PET: p-value of FAT                                      |
|                     | ct3_p         | caliper test 3%: p-value                                     |
|                     | ct3_N         | caliper test 3%: number of included trials                   |
|                     | ct3_P         | caliper test 3%: proportion over-caliper                     |
|                     | ct5_p         | caliper test 5%: p-value                                     |
|                     | ct5_N         | caliper test 5%: number of included trials                   |
|                     | ct5_P         | caliper test 5%: proportion over-caliper                     |
|                     | ct10_p        | caliper test 10%: p-value                                    |
|                     | ct10_N        | caliper test 10%: number of included trials                  |
|                     | ct10_P        | caliper test 10%: proportion over-caliper                    |
|                     | ct15_p        | caliper test 15%: p-value                                    |
|                     | ct15_N        | caliper test 15%: number of included trials                  |
|                     | ct15_P        | caliper test 15%: proportion over-caliper                    |
|                     | tes_p         | TES: p-value                                                 |
|                     | tes_pE        | TES: number of expected significant results                  |
|                     | tes_pO        | TES: number of observed significant results                  |
