# Supplementary material for: Examining publication bias—a simulation-based evaluation of statistical tests on publication bias
Source: PeerJ. 2017 Nov 30;5:e4115. doi: 10.7717/peerj.4115 (PMC5712469; doi:10.7717/peerj.4115)
Supplement: Supplemental Information 1 [file peerj-05-4115-s001.zip]

Archive with 13 entries (13 files):
- clear_char.do
- Codebook.pdf
- fastreg.do
- graph.do
- readme.txt
- sim_power.do
- sim_process.do
- sim1.dta
- sim2.dta
- sim3.dta
- sim4.dta
- simulation.do
- analysis.do
