# Supplementary material for: Examining publication bias—a simulation-based evaluation of statistical tests on publication bias
Source: PeerJ. 2017 Nov 30;5:e4115. doi: 10.7717/peerj.4115 (PMC5712469; doi:10.7717/peerj.4115)
Supplement: Supplemental Information 1 [file peerj-05-4115-s001.zip › clear_char.do]

*Robert Picard
*http://www.statalist.org/forums/forum/general-stata-discussion/general/1291200-how-do-i-delete-all-characteristics-from-a-dataset
*last access 02.02.2017
capture program drop clear_char 
program define clear_char

    version 9.2
    syntax [varlist] , [Dataset only]
    
    local vlist `varlist'
    
    if "`dataset'" ~= "" {
        local vlist _dta `vlist'
        if "`only'" != "" local vlist "_dta"
    }
    
    foreach v in `vlist' {
        local ilist: char `v'[]
        foreach i in `ilist' {
            char `v'[`i']
        }
    }
end
