# Supplementary material for: Examining publication bias—a simulation-based evaluation of statistical tests on publication bias
Source: PeerJ. 2017 Nov 30;5:e4115. doi: 10.7717/peerj.4115 (PMC5712469; doi:10.7717/peerj.4115)
Supplement: Supplemental Information 1 [file peerj-05-4115-s001.zip › fastreg.do]

* fastreg.ado
* Save this file in your personal ado directory as fastreg.ado
* Type adopath in Stata to find the correct directory
* Please let me know if you find any errors, or if you have made
* any improvements that you would like to share
* Copyright Paul Geertsema 2014
* This program is free software: you can redistribute it and/or modify
* it under the terms of the GNU General Public License as published by
* the Free Software Foundation, either version 3 of the License, or
* (at your option) any later version.
* This program is distributed in the hope that it will be useful,
* but WITHOUT ANY WARRANTY; without even the implied warranty of
* MERCHANTABILITY or FITNESS FOR A PARTICULAR PURPOSE. See the
* GNU General Public License for more details.
* You should have received a copy of the GNU General Public License
* along with this program. If not, see http://www.gnu.org/licenses/.
* CODE START
* USAGE: fastreg varlist [in], [CALCVCV] [NOMISSINGTEST] [NOCONST]
* MATA: set up a mata function that calculates OLS estimates
version 13
mata:
stata("capture mata mata drop m_fastreg()")
void m_fastreg(string scalar depvar, string scalar regs,
real scalar startob, real scalar endob,
real scalar calcvcv, real scalar nomissingtest,
real scalar noconst)
{
real matrix X, XX, Xy, V
real vector beta, e, s2
real scalar N, k, dof
st_view(y, (startob, endob), tokens(depvar))
st_view(X, (startob, endob), tokens(regs))

if (nomissingtest == 0) {
missing = rowmissing((y, X))
X = select(X, missing:==0)
y = select(y, missing:==0)
}
if (noconst == 0) {
XX = quadcross(X,1,X,1)
Xy = quadcross(X,1,y,0)
N = rows(X)
k = cols(X)
if(rank(XX) < k+1) error(2001)
}
else {
XX = quadcross(X,X)
Xy = quadcross(X,y)
N = rows(X)
k = cols(X)
if(rank(XX) < k) error(2001)
}
beta = (invsym(XX)*Xy)'
st_matrix("r(beta)", beta)
st_numscalar("r(N)", N)
if (calcvcv != 0) {
if (noconst == 0) {
e = y - (X, J(N,1,1)) * beta'
dof = N-k-1
}
else {
e = y - X * beta'
dof = N-k
}
s2 = quadcross(e,e)/(dof)
V = s2*cholinv(XX)
st_matrix("r(V)", V)
st_numscalar("r(dof)", dof)
}
}
end


* STATA: add stata wrapper to mata function
capture program drop fastreg
program fastreg, eclass
version 13
syntax varlist [in/], [CALCVCV] [NOMISSINGTEST] [NOCONST]
if "`in'" != "" {
* extract starting and ending observation from -in- range
gettoken startob in: in, parse("/")
gettoken dummy in: in, parse("/")
local endob "`in'"
}
else {
* full dataset
local startob = 1
local endob = _N
}
local depvar: word 1 of `varlist'
local regs: list varlist - depvar
* nomissing set -> user guarantees there are no missing obs in sample
local bool_nomissingtest = cond("`nomissingtest'" == "", 0, 1)
* noconst set -> regression without intercept
local bool_noconst = cond("`noconst'" == "", 0, 1)
* calcvcv set -> if specified,
* VCV is calculated -> allows statistical inference
local bool_calcvcv = cond("`calcvcv'" == "", 0, 1)
if `bool_noconst' == 0 local vnames `regs' _cons
else local vnames `regs'
* call mata regression routine
mata: m_fastreg("`depvar'", "`regs'", `startob', `endob', /*
*/ `bool_calcvcv', `bool_nomissingtest', `bool_noconst')
tempname b
mat `b' = r(beta)

* if no VCV required...
if `bool_calcvcv' == 0 {
matname `b' `vnames', c(.)
ereturn post `b'
}
else {
tempname V
tempname dof
mat `V' = r(V)
local dof = r(dof)
local N = r(N)
matname `V' `vnames'
matname `b' `vnames', c(.)
ereturn post `b' `V', depname(`depvar') obs(`N') dof(`dof')
}
end
* CODE END
