# Supplementary material for: Examining publication bias—a simulation-based evaluation of statistical tests on publication bias
Source: PeerJ. 2017 Nov 30;5:e4115. doi: 10.7717/peerj.4115 (PMC5712469; doi:10.7717/peerj.4115)
Supplement: Supplemental Information 1 [file peerj-05-4115-s001.zip › readme.txt]

*Examining Publication Bias � A Simulation-Based Evaluation of Statistical Tests on Publication Bias
*Andreas Schneck

*last checked 22.06.2017

Note, that the analysis-files are in Stata format (Version 14.1)


The analysis profits from the fastreg command by Paul Geertsema and the clear_char command by Robert Picard
The analysis was conducted in four steps:

1. Power analysis
sim_power.do

Conducts a power analysis and specifies the number of runs needed to obtain adequately powered results. This do-file sets the experimental dataset for the simmulation.

2. Simmulation
simulation.do

Runs the simmulation process (sim_process.do) for the complete experimental setup produced by 1.
Note, that 1. produces only a fractional design (1/4) because the simmulation do-file was run in four paralell sessions to reduce runtime.
This do-file produces the simmulation-results (sim1-sim4.dta enclosed to save runtime).

3. Data-analysis on simulation results
analysis.do

Codebook.pdf provides further information on the variables in the simulation dataset.

Conducts the data-analysis reported in the article and produces the tables reported.

4.
In graph.do the exemplary figures 1-4 are generated based on the simmulation process (sim_process.do)
